# Supplementary material for: Diagnostics in Patients Suspect for Breast Cancer in The Netherlands
Source: Curr Oncol. 2021 Nov 29;28(6):4998–5008. doi: 10.3390/curroncol28060419 (PMC8700505; doi:10.3390/curroncol28060419)

Supplementary Materials

# Diagnostics in Patients Suspect for Breast Cancer in The Netherlands

Madelon M. Voets, Catharina G. M. Groothuis-Oudshoorn, Liset H. J. Veneklaas, Srirang Manohar, Mariël Brinkhuis, Jeroen Veltman, Linda de Munck, Lioe-Fee de Geus-Oei, Mireille J. M. Broeders and Sabine Siesling

**Table S1.** Diagnostic pathways and time between visits and diagnosis per hospital.

| Hospital | No. of Patients | Same-Day Diagnosis |      | Triple Diagnostics |      | Same-Day & Triple Diagnosis |      | Days Between First and Second Hospital Visit | Days Between First and Last Hospital Visit/Diagnosis | Days Between First Hospital Visit and Diagnosis |
|----------|-----------------|--------------------|------|--------------------|------|-----------------------------|------|----------------------------------------------|------------------------------------------------------|-------------------------------------------------|
|          | <i>N</i>        | <i>N</i>           | %    | <i>N</i>           | %    | <i>N</i>                    | %    | <i>Mean</i>                                  | <i>Mean</i>                                          | <i>Max</i>                                      |
| 1        | 384             | 272                | 70.8 | 245                | 63.8 | 237                         | 61.1 | 1.7                                          | 4.0                                                  | 70                                              |
| 3        | 311             | 206                | 66.2 | 207                | 66.6 | 179                         | 57.6 | 1.6                                          | 4.2                                                  | 51                                              |
| 4        | 121             | 88                 | 72.7 | 73                 | 60.3 | 70                          | 57.9 | 1.2                                          | 2.4                                                  | 28                                              |
| 6        | 217             | 162                | 74.7 | 136                | 62.7 | 123                         | 56.7 | 2.3                                          | 5                                                    | 59                                              |
| 8        | 419             | 305                | 72.8 | 271                | 64.7 | 262                         | 62.5 | 1.9                                          | 3.5                                                  | 65                                              |
| 9        | 784             | 343                | 43.8 | 406                | 51.8 | 286                         | 36.5 | 2.6                                          | 6.2                                                  | 84                                              |
| Total    | 2,236           | 1,376              | 61.5 | 1,338              | 59.8 | 1,157                       | 51.7 | 1.9                                          | 4.2                                                  | 84                                              |

\* Triple diagnostics is defined as the combination of mammography, US breast and pathology diagnosis on the same diagnostic care day.

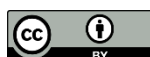

Supplement: Supplementary file 1 [file curroncol-28-00419-s001.zip › curroncol-1450244-supplementary.pdf]
